# Supplementary material
Source: Springer Nature journal article supplement (https://www.springermedizin.de/resource/supplementary/12891_2004_140_MOESM2_ESM.pdf/9510584)
Supplement: MOESM2 [file 9510584]

## Change in functional performance in exercise and control group at 6 week and 6 month follow-up.

| Test of physical function                                                   |               | Exercise group |      |               | Control group |      |               | p <sup>†</sup> |
|-----------------------------------------------------------------------------|---------------|----------------|------|---------------|---------------|------|---------------|----------------|
|                                                                             |               | n              | mean | 95% CI        | n             | mean | 95% CI        |                |
| One-leg jump <sup>*</sup><br>cm                                             | baseline      | 29             | 54   | 9.2 – 125.8   | 28            | 38   | 3.4 – 98.1    | 0.04           |
|                                                                             | Change at 6 w | 27             | 1.3  | - 27.7 – 35.8 | 25            | 3.1  | - 19.8 – 21.2 | 0.60           |
|                                                                             | Change at 6 m | 28             | 2.3  | -34.0 – 51.1  | 26            | 1.3  | - 23.1 – 25.2 | 0.95           |
| Knee bendings/<br>30 sec <sup>*</sup>                                       | baseline      | 29             | 22   | 10 – 34       | 28            | 21   | 8 – 40        | 0.38           |
|                                                                             | Change at 6 w | 27             | 3    | - 9 – 10      | 24            | 2    | - 12 – 15     | 0.63           |
|                                                                             | Change at 6 m | 28             | 4    | - 5 – 18      | 26            | 2    | - 11 – 15     | 0.08           |
| Toe raises/20<br>sec <sup>*</sup>                                           | baseline      | 29             | 17   | 9 - 27        | 28            | 15   | 6 - 29        | 0.34           |
|                                                                             | Change at 6 w | 27             | 1    | - 6 – 8       | 24            | 3    | - 3 – 10      | 0.22           |
|                                                                             | Change at 6 m | 27             | 1    | - 7 – 12      | 26            | 2    | - 6 – 13      | 0.46           |
| Lateral step-ups/30 sec <sup>*</sup>                                        | baseline      | 29             | 14   | 7 – 26        | 29            | 13   | 2 - 25        | 0.60           |
|                                                                             | Change at 6 w | 27             | 2    | - 11 – 9      | 25            | 1    | - 5 – 8       | 0.13           |
|                                                                             | Change at 6 m | 28             | 2    | - 9 – 7       | 26            | 1    | - 6 – 7       | 0.22           |
| One-leg rise <sup>*</sup><br>cm (lower<br>value indicates<br>better result) | baseline      | 30             | 44   | 28 - 61       | 29            | 48   | 30 - 64       | 0.04           |
|                                                                             | Change at 6 w | 27             | -1   | - 9 – 11      | 26            | 0    | - 9 – 11      | 0.13           |
|                                                                             | Change at 6 m | 28             | 0    | - 9 – 8       | 27            | 1    | - 10 – 12     | 0.50           |
| Aerobic<br>capacity<br>mlO <sub>2</sub> /kg <sup>x</sup> min                | baseline      | 27             | 25.9 | 16.2 – 41.8   | 24            | 25.2 | 11.5 – 33.2   | 0.66           |
|                                                                             | Change at 6 w | 26             | 2.5  | -4.0 – 9.7    | 23            | 2.0  | -4.8 – 15.0   | 0.57           |
|                                                                             | Change at 6 m | 27             | 2.1  | - 7.0 – 13.0  | 22            | 3.4  | - 9.1 – 18.5  | 0.40           |

\*Mean of left and right leg

†Comparisons between groups
